# Supplementary material
Source: PubMed Central journal article supplement (PMC2966090)
Supplement: supp_M110.136812_supplemental_Rev.pdf [file supp_M110.136812_supplemental_Rev.pdf]

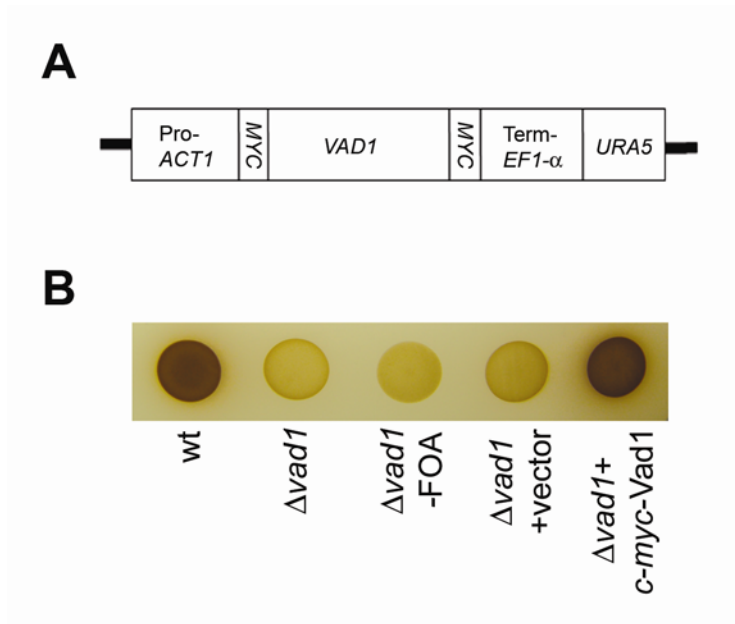

**Figure S1. Expression of *c-myc*-tagged Vad1 in *C. neoformans*.** (A) Scheme of expression construct of *c-myc*-Vad1 fusion protein. (B) Laccase expression was determined by melanin production. Cells were spotted onto minimal media containing norepinephrine and incubated for 2 d at 30°C.

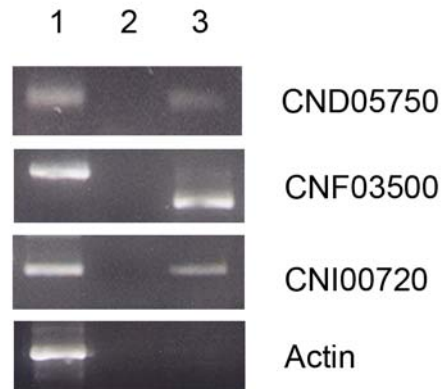

**Figure S2. Reverse transcriptase-PCR analysis of mRNA after RNA immunoprecipitation.** Photograph showing the amplified products in a 1% agarose gel stained with ethidium bromide. Input, 1; genomic DNA, 2; H99-RIP (control), 3; myc-Vad1-RIP. CND05750; MF $\alpha$ 1, CNF03500; cell wall organization and biogenesis putative, CNI00720; transporter putative.

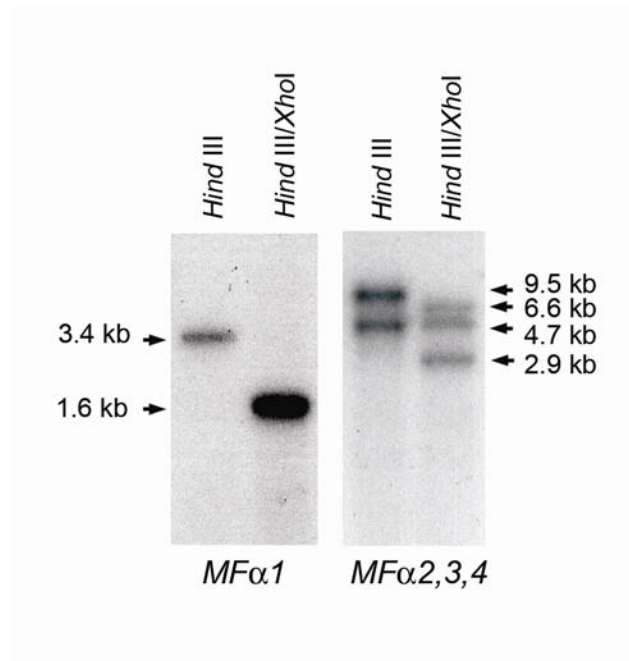

**Figure S3. Southern blot analysis of *MFα* genes of *C. neoformans*.** Southern blot analysis of wild type DNA using the indicated enzymes, hybridized with *MFα1*- (left panel) or *MFα2,3,4*-specific probes (right panel) consisting of a 200-bp region of the 3' UTR of *MFα1* or *MFα2*, respectively.

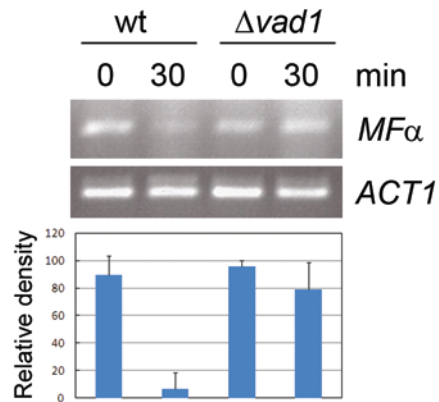

**Figure S4. Capped RNAs accumulate in a  $\Delta vad1$  mutant.** RNA Ligase Mediated Rapid Amplification of cDNA ENds (RLM-RACE) analysis was performed with total RNA isolated from the indicated strains at the indicated times after transcription repression by 1,10-phenanthroline by using the FirstChoice RLM-RACE kit according to manufacturer's protocol (Applied Biosystems). PCR amplification was performed by using the gene specific primer MF-mid-a (Supplementary Table 3) and a universal primer (supplied by the manufacturer) for *MFα*. The actin gene, *ACT1*, was used as loading control using primers ACT-70 and ACT-a (Supplementary Table 3). This analysis was performed in three independent experiments, and *MFα/ACT1* ratios were calculated for the indicated strains by densitometry (UN-SCAN-IT gel 6.1, Silk Scientific Corporation).

**A**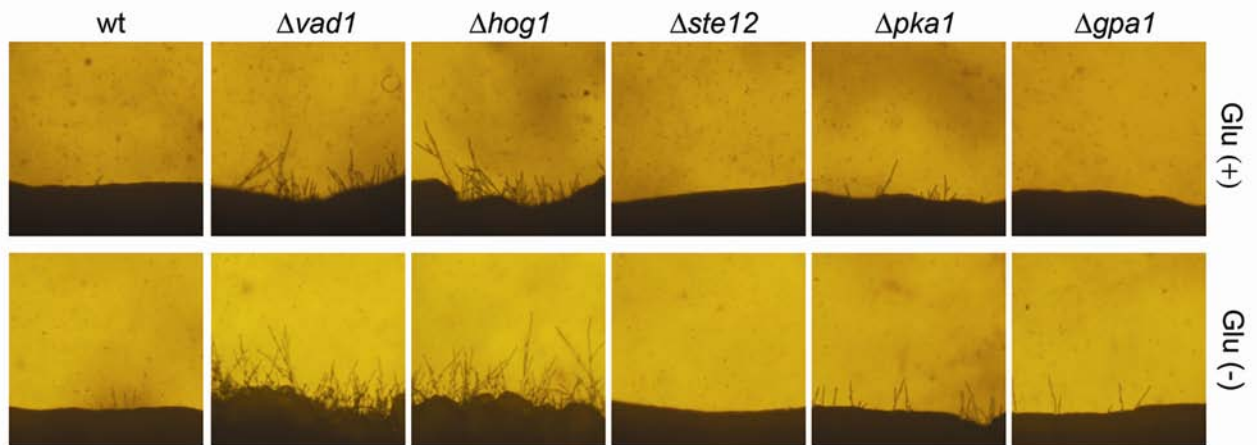**B**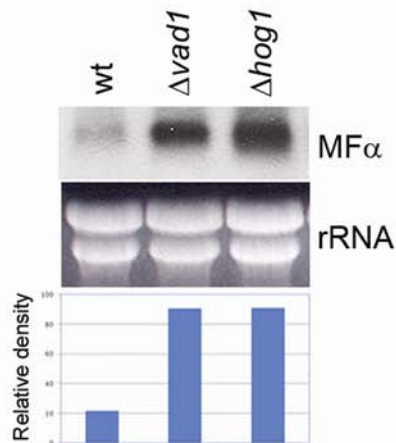

**Figure S5. Comparison of mating phenotypes and *MF $\alpha$*  transcript levels of  $\Delta vad1$  and signal transduction mutant strains.** (A) Indicated strains were cocultured on V8 mating media with or without glucose and incubated for 4 d at room temperature in the dark. Representative edges of the mating patches were photographed at 40x magnification. (B) Northern blot analysis was performed with total RNA isolated from wild type or  $\Delta hog1$  strains grown to mid-log phase. The blot was hybridized with the coding region from *MF $\alpha$* . The graph demonstrates relative quantitative measurement of transcript levels of *MF $\alpha$*  normalized to the rRNA loading control by UN-SCAN-IT-GEL 6.1 (Silk Scientific).

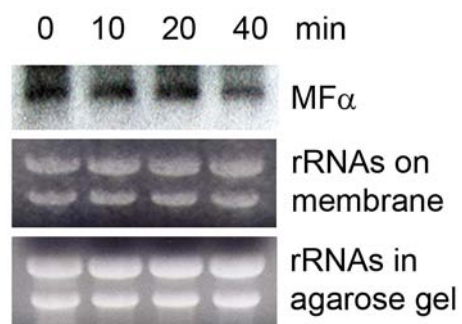

**Figure S6. Hog1 does not alter stability of *MFα* mRNA in  $\Delta vad1$  mutant cells.** Northern blot analysis was performed with total RNA isolated from a  $\Delta vad1 + HOG1$  strain. The blot was hybridized with an ORF region from *MFα* genes (at the indicated time after transcriptional repression by 1,10-phenanthroline). rRNAs levels were used as loading and transfer control within gels and membranes, respectively and visualized by ethidium bromide.

**Supplementary Table S1. Strains used in this study.** All of strains are serotype A of *C. neoformans*.

| Name   | Genotype                                                                                                                     | Reference             |
|--------|------------------------------------------------------------------------------------------------------------------------------|-----------------------|
| H99    | <i>MAT<math>\alpha</math></i>                                                                                                | Perfect et al, 1993   |
| KN99   | <i>MAT<math>\alpha</math></i>                                                                                                | Nielsen et al, 2003   |
| VAD1   | <i>MAT<math>\alpha</math> vad1<math>\Delta</math>::URA5 ura5</i>                                                             | Panepinto et al, 2005 |
| YP513  | <i>MAT<math>\alpha</math> ura5</i> (5-FOA <sup>+</sup> )                                                                     | This study            |
| YP510  | <i>MAT<math>\alpha</math> vad1<math>\Delta</math> ura5</i> (5-FOA <sup>+</sup> )                                             | This study            |
| YP501  | <i>MAT<math>\alpha</math> vad1<math>\Delta</math> ura5 ACT1<sub>pro</sub>-MYC-VAD1-MYC-EF1<sub>ter</sub> URA5</i>            | This study            |
| YP503  | <i>MAT<math>\alpha</math> ura5</i> empty vector ( <i>URA5</i> )                                                              | This study            |
| YP519  | <i>MAT<math>\alpha</math> vad1<math>\Delta</math> ura5</i> empty vector ( <i>URA5</i> )                                      | This study            |
| YP514  | <i>MAT<math>\alpha</math> ura5 ACT1<sub>pro</sub>-MFA1-EF1<sub>ter</sub> URA5</i>                                            | This study            |
| YP515  | <i>MAT<math>\alpha</math> ura5 ACT1<sub>pro</sub>-MFA1-3'UTR<sub>ter</sub> URA5</i>                                          | This study            |
| YP532  | <i>MAT<math>\alpha</math> ura5 GPD1<sub>pro</sub>-GFP-MFA1-3'UTR<sub>ter</sub> URA5</i>                                      | This study            |
| YP533  | <i>MAT<math>\alpha</math> vad1<math>\Delta</math> ura5 GPD1<sub>pro</sub>-GFP-MFA1-3'UTR<sub>ter</sub> URA5</i>              | This study            |
| YP527  | <i>MAT<math>\alpha</math> ura5 GPD1<sub>pro</sub>-MFA1 5'UTR#1-GFP-EF1<sub>ter</sub> URA5</i>                                | This study            |
| YP530  | <i>MAT<math>\alpha</math> ura5 GPD1<sub>pro</sub>-MFA1 5'UTR#4-GFP-EF1<sub>ter</sub> URA5</i>                                | This study            |
| YP538  | <i>MAT<math>\alpha</math> ura5 GPD1<sub>pro</sub>-MFA1 5'UTR#1-GFP-MFA1-3'UTR<sub>ter</sub> URA5</i>                         | This study            |
| YP539  | <i>MAT<math>\alpha</math> vad1<math>\Delta</math> ura5 GPD1<sub>pro</sub>-MFA1 5'UTR#1-GFP-MFA1-3'UTR<sub>ter</sub> URA5</i> | This study            |
| STE12  | <i>MAT<math>\alpha</math> ste12<math>\Delta</math>::ADE2 ade2</i>                                                            | Yue et al, 1999       |
| CDC40  | <i>MAT<math>\alpha</math> pka1<math>\Delta</math>::ADE2 ade2</i>                                                             | Hicks et al, 2004     |
| YSB83  | <i>MAT<math>\alpha</math> gpa1<math>\Delta</math>::NAT-STM#177</i>                                                           | Bahn et al, 2004      |
| YSB121 | <i>MAT<math>\alpha</math> NEO</i>                                                                                            | Bahn et al, 2004      |
| YP548  | <i>MAT<math>\alpha</math> ura5 NAT</i> empty vector ( <i>URA5</i> )                                                          | This study            |
| YP549  | <i>MAT<math>\alpha</math> ura5 NAT ACT1-VAD1 URA5</i>                                                                        | This study            |
| YSB64  | <i>MAT<math>\alpha</math> hog1<math>\Delta</math>::NAT-STM#177</i>                                                           | Bahn et al, 2005      |
| YSB81  | <i>MAT<math>\alpha</math> hog1<math>\Delta</math>::NEO</i>                                                                   | Bahn et al, 2005      |
| YP508  | <i>MAT<math>\alpha</math> hog1<math>\Delta</math>::NAT-STM#177 ura5</i> (5-FOA <sup>+</sup> )                                | This study            |
| YP521  | <i>MAT<math>\alpha</math> hog1<math>\Delta</math>::NAT-STM#177 VAD1-URA5</i>                                                 | This study            |
| YP522  | <i>MAT<math>\alpha</math> hog1<math>\Delta</math>::NAT-STM#177 ura5</i> empty vector ( <i>URA5</i> )                         | This study            |
| YP540  | <i>MAT<math>\alpha</math> vad1<math>\Delta</math> ura5 ACT1<sub>pro</sub>-HOG1 URA5</i>                                      | This study            |

**Supplementary Table S2. Complete list of target genes showing Vad1 binding by RNA Immunoprecipitation.**

| Locus     | Name                                                                                              | SDabove <sup>a</sup> | p-Value <sup>b</sup> |
|-----------|---------------------------------------------------------------------------------------------------|----------------------|----------------------|
| CNA05770  | hypothetical protein                                                                              | 53.2                 | 0                    |
| CND04720  | hypothetical protein                                                                              | 34.5                 | 0                    |
| CNB00010  | hypothetical protein                                                                              | 23.6                 | 0                    |
| CND05750  | pheromone alpha                                                                                   | 18.4                 | 0                    |
| CNE00990  | ubiquinone biosynthesis-related protein putative                                                  | 16.7                 | 0                    |
| CNM00900  | conserved hypothetical protein                                                                    | 16.1                 | 0                    |
| CNG01120  | expressed protein                                                                                 | 14.3                 | 0                    |
| CNB03820  | expressed protein                                                                                 | 12.7                 | 0                    |
| CND05690  | MFalpha3                                                                                          | 12.2                 | 0                    |
| CNF03500  | cell wall organization and biogenesis-related protein putative                                    | 12.0                 | 0                    |
| CNJ00710  | hypothetical protein                                                                              | 11.1                 | 0                    |
| CND00920  | mitochondrion protein putative                                                                    | 9.9                  | 0                    |
| CNI02610  | hypothetical protein                                                                              | 9.7                  | 0                    |
| CNI03530  | expressed protein                                                                                 | 9.0                  | 0                    |
| CNAG07413 | 171 3.seq.159 start:391516 end:392957 strand + 440                                                | 8.9                  | 0                    |
| CND03890  | asparagine-tRNA ligase putative                                                                   | 8.1                  | 0                    |
| CNA05980  | cytoplasm protein putative                                                                        | 7.8                  | 1.87E-12             |
| CNL06420  | conserved hypothetical protein                                                                    | 6.7                  | 4.08E-09             |
| CNE04100  | cyclin-dependent protein kinase regulator putative                                                | 6.3                  | 5.06E-08             |
| CNA05980  | cytoplasm protein putative                                                                        | 6.3                  | 5.06E-08             |
| CNN02220  | Epoxide hydrolase 1 (EC 3.3.2.3) putative                                                         | 6.1                  | 1.78E-07             |
| CNG04690  | hypothetical protein                                                                              | 6.0                  | 3.75E-07             |
| CNA04180  | hypothetical protein                                                                              | 5.5                  | 6.61E-06             |
| CNC04320  | conserved hypothetical protein                                                                    | 5.4                  | 8.22E-06             |
| CNM01490  | hypothetical protein                                                                              | 5.4                  | 8.42E-06             |
| CNI01880  | ATP-dependent RNA helicase putative                                                               | 5.2                  | 2.62E-05             |
| CNA05270  | conserved hypothetical protein                                                                    | 4.4                  | 0.001509             |
| CNF04720  | pim1 protein (poly(a)+ RNA transport protein 2) putative                                          | 4.0                  | 0.009513             |
| CNAG00597 | 170 3.seq.175 start:417948 end:418924 strand - 36                                                 | 4.0                  | 0.009513             |
| CNL05600  | pyruvate dehydrogenase e1 component beta subunit<br>mitochondrial precursor (ec 1.2.4.1) putative | 3.7                  | 0.024502             |
| CNAG04006 | 171 3.seq.157 start:385200 end:388284 strand + 54                                                 | 3.7                  | 0.028622             |
| CND01090  | hypothetical protein                                                                              | 3.6                  | 0.038358             |

<sup>a</sup>SDabove indicates the number of standard deviations (based on 4 microarray analyses) that the indicated gene signal was above background signal, the later defined as the mean level of signal of all genes in the immunoprecipitated RNA sample. <sup>b</sup>p-Values were corrected for False Discovery Rate (FDR) using the Benjamini-Hochberg method.



**Supplementary Table S3. Primers used in this study.**

| Name                    | Sequence (5' to 3') <sup>a</sup>                                                                       | Restriction enzyme | Relative strain or purpose |
|-------------------------|--------------------------------------------------------------------------------------------------------|--------------------|----------------------------|
| myc-VAD1-S <sup>b</sup> | GGAGG <u>CAATTG</u> ATGGAGCAGAAGCTCATAAGCGAGGA<br>GGACCTC <b>ATGGCTTCTTCCTCAACGTAAGCC</b>              | <i>MunI</i>        | YP101                      |
| myc-VAD1-A <sup>b</sup> | GTGGT <u>CAATTG</u> TTAGAGG TCCTCCTCG CTTATG AGC TTC<br>TGC TCG GCTTGAG <b>CCTGTTGGCTCTGGCTTGCACCG</b> | <i>MunI</i>        | YP101                      |
| MFa1-ORF-S1             | ATATAAG <u>GAATTC</u> GACGCCTTCACTGCCATCTTC                                                            | <i>EcoRI</i>       | YP104, YP108               |
| MFa1-ORF-A              | CCGTAT <u>GAATTC</u> TAGGCGATGACACAAAG                                                                 | <i>EcoRI</i>       | YP104                      |
| MFa1-3'UTR-A            | AATATT <u>ACCGGT</u> TGCTTGAGTGACGGATGC                                                                | <i>AgeI</i>        | YP108, YP119, YP126        |
| MFa1-3'UTR-NS           | GTTCCCAAGCAGTCAAGCCG                                                                                   |                    | Southern & northern        |
| MFa1-3'UTR-NA           | GAACAAGGCGATGTTGGCTG                                                                                   |                    | Southern & northern        |
| MFa2-3'UTR-NS           | ACATCCCCTCTGCGTGTTAG                                                                                   |                    | Southern & northern        |
| MFa2-3'UTR-NA           | AGTGGGGTCCGATTGAGTC                                                                                    |                    | Southern & northern        |
| ACT1-70                 | ACCGCGTCTCCTAATATGC                                                                                    |                    | RT-PCR                     |
| ACT1-a                  | CATGAATTCAGACATGTTGGGCGAG                                                                              |                    | PCR                        |
| MF-mid-a                | GTTGCGAGGGACTTCAGAAG                                                                                   |                    | PCR                        |
| MFa1-A                  | TTAGGCGATGACACAAAG                                                                                     |                    | RT-PCR                     |
| MFa1-5'UTR-S            | GCGGAG <u>GAATTC</u> TTCAACGTGTTCTATTG                                                                 | <i>EcoRI</i>       | YP111, YP114, YP126        |
| MFa1-5'UTR-A4           | GGCAGC <u>GAATTC</u> CTTGAACTTTTATATG                                                                  | <i>EcoRI</i>       | YP114                      |
| MFa1-5'UTR-A1           | GATATAG <u>GAATTC</u> TGTAGCGGATTATTGAGTG                                                              | <i>EcoRI</i>       | YP111                      |
| MFa1-ORF-S2             | TTATGTAGATCTATGGACGCCTTCACTTCCATC                                                                      | <i>BglII</i>       | YP119, YP126               |
| GFP-S                   | GAAATT <u>GAATTC</u> CATGTCCAAGGGTGAGGAGCTC                                                            | <i>EcoRI</i>       | YP111, YP114, YP119, YP126 |
| GFP-A                   | ATATATAGATCTGAGGTCCTCCTCGGAGATGAG                                                                      | <i>BglII</i>       | YP111, YP114, YP119, YP126 |
| HOG1-S                  | ATATAAG <u>GAATTC</u> GCGCCGATTTTGCAAGCTCTCC                                                           | <i>EcoRI</i>       | YP127                      |
| HOG1-A                  | ATATAT <u>GAATTC</u> TTAGCTGGCAGGAGCAGCG                                                               | <i>EcoRI</i>       | YP127                      |

<sup>a</sup>Restriction site is underlined.

<sup>b</sup>c-myc and VAD1 are in italic and bold types, respectively.

## SUPPLEMENTARY REFERENCE

- Perfect, J.R., Toffaletti, D.L., and Rude, T.H. 1993. The gene encoding phosphoribosylaminoimidazole carboxylase (*ADE2*) is essential for growth of *Cryptococcus neoformans* in cerebrospinal fluid. *Infect Immun* **61**(10): 444
- Nielsen, K., Cox, G.M., Wang, P., Toffaletti, D.L., Perfect, J.R., and Heitman, J. 2003. Sexual Cycle of *Cryptococcus neoformans* var. *grubii* and Virulence of Congenic a and {alpha} Isolates. *Infect Immun* **71**(9): 4831-4841.
- Yue, C., Cavallo, L.M., Alspaugh, J.A., Wang, P., Cox, G.M., Perfect, J.R., and Heitman, J. 1999. The STE12{alpha} Homolog Is Required for Haploid Filamentation But Largely Dispensable for Mating and Virulence in *Cryptococcus neoformans*. *Genetics* **153**(4): 1601-1615.
